# Supplementary material
Source: PubMed Central journal article supplement (PMC5539452)
Supplement: Legend_for_Movie_1.pdf [file Legend_for_Movie_1.pdf]

## **Legend for Movie 1**

*The video illustrates the sequential engagement of different attention gain mechanisms modulating population responses to contrast of macaque V4 neurons.*

*On the left, population normalized CRFs in the attended (red) vs. unattended (blue) condition are plotted for 20-ms windows, time-locked to stimulus onset (see text). Successive windows are shifted by 1 ms on each video frame.*

*On the right, results are reported from the regression analysis aimed at testing attentional models in the corresponding time windows (see text). Each point represents the average population response to a single contrast level in the attended vs. unattended condition and the black line represents the linear regression for the plotted points ( $p < 0.01$ ).*
