# Supplementary material
Source: PubMed Central journal article supplement (PMC5539452)

CRFs

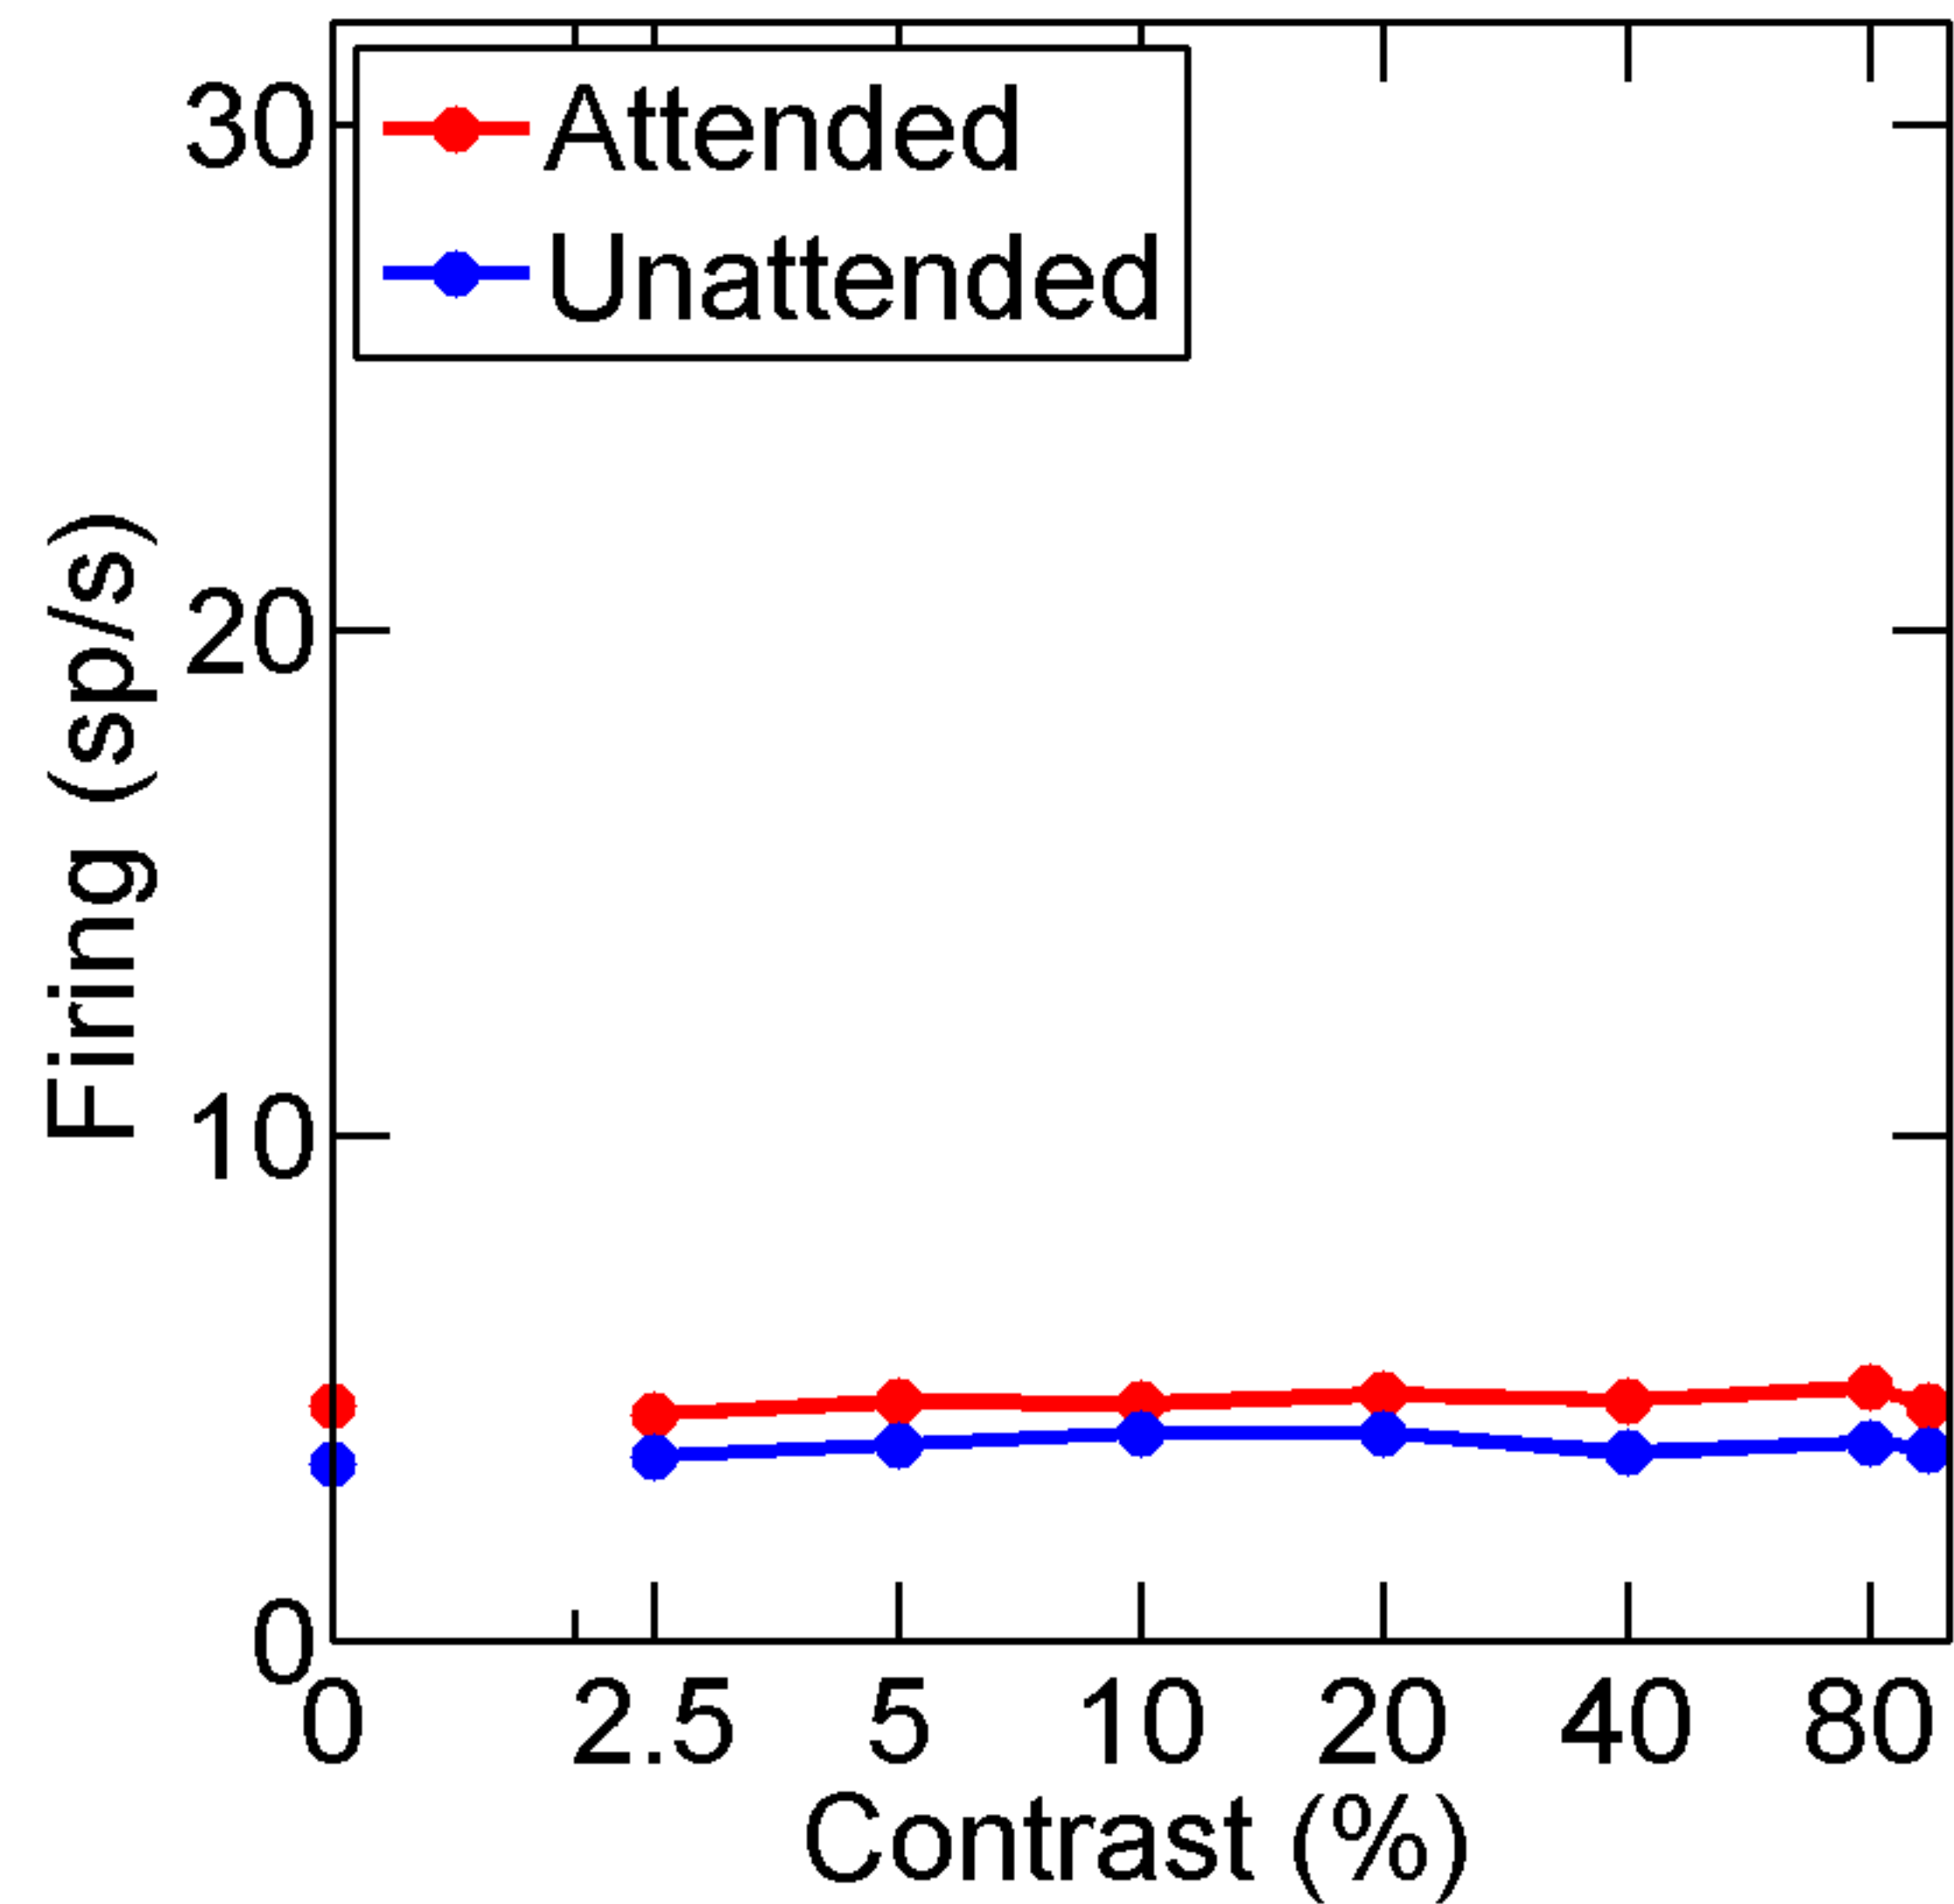

Model-slope

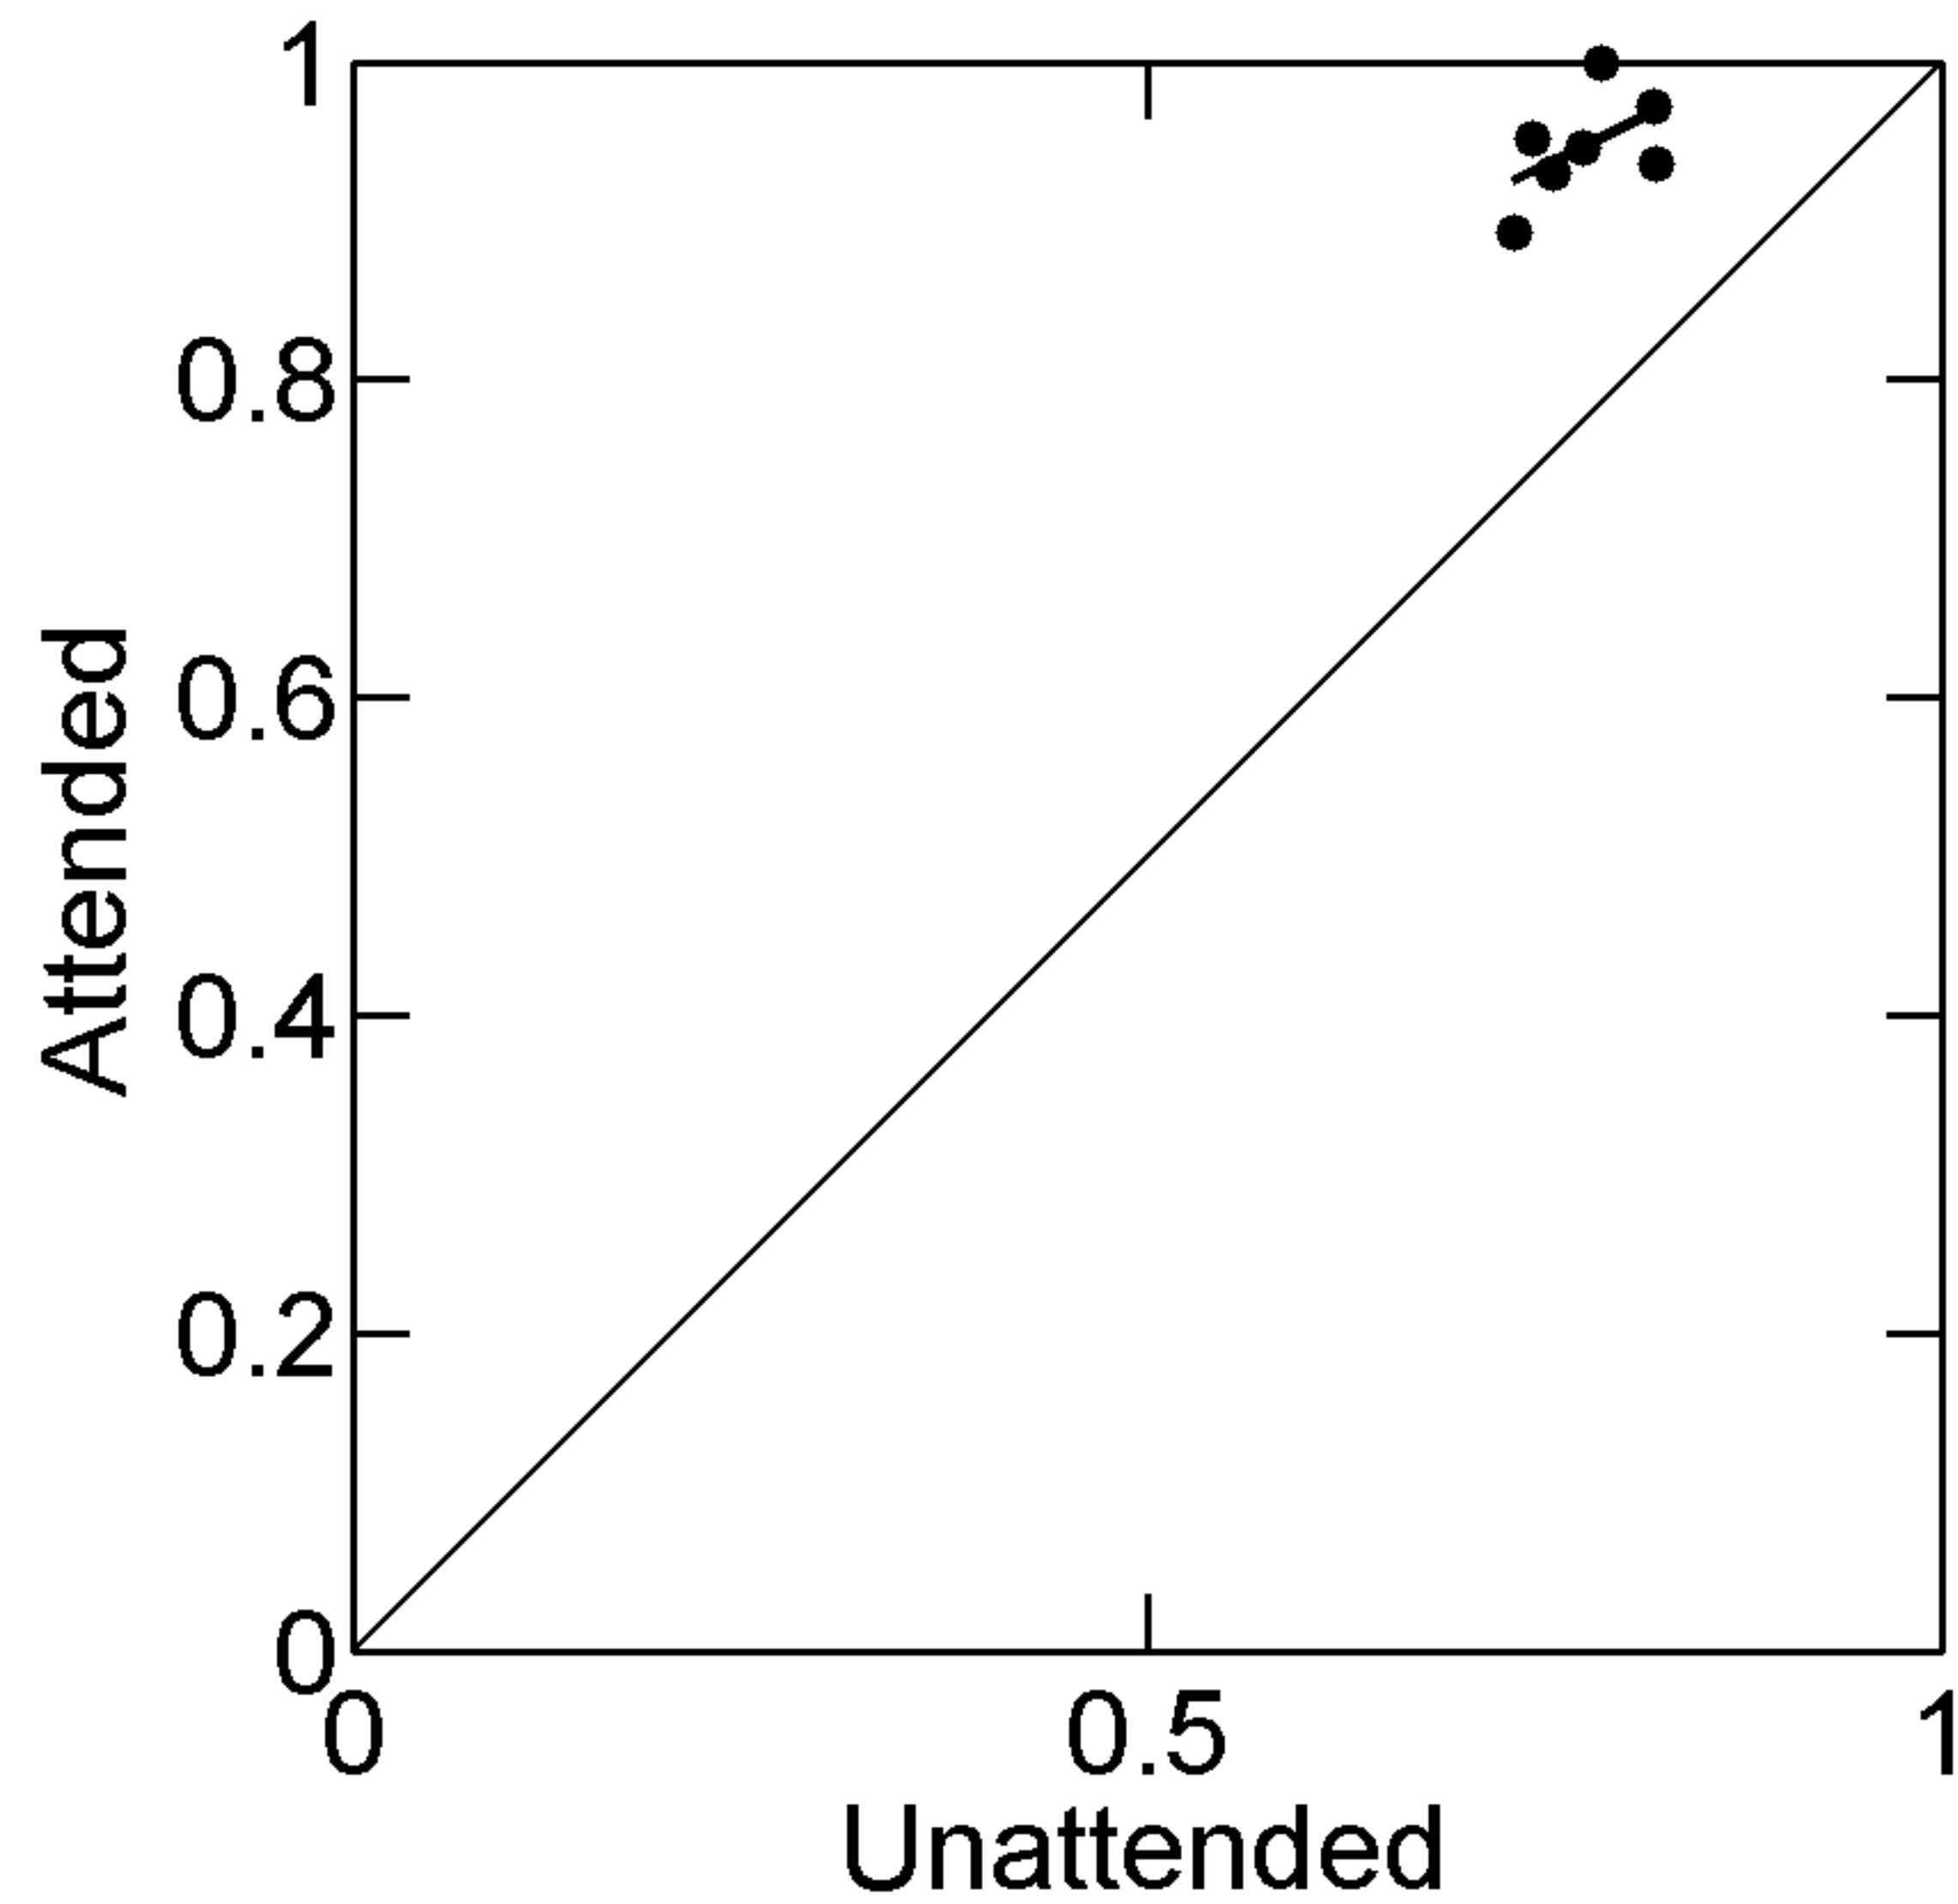

Supplement: Still_image_for_Movie_1.pdf [file Still_image_for_Movie_1.pdf]
